# Supplementary material for: Regular Healthcare Provider Status Does Not Moderate Racial/Ethnic Differences in Human Papillomavirus (HPV) and HPV Vaccine Knowledge
Source: MDPI journal article supplement (doi:10.3390/vaccines9070802), 2021-07-20
Supplement: s1 [file s1]

## Supplementary Tables

| Table S1. Weighted Univariable Logistic Regression Analyses Examining HPV Knowledge and Awareness by Racial/Ethnic Group |                |                                                             |
|--------------------------------------------------------------------------------------------------------------------------|----------------|-------------------------------------------------------------|
|                                                                                                                          | Race/Ethnicity | Model 1<br>Unadjusted OR <sup>a</sup> (95% CI) <sup>b</sup> |
| Heard of HPV                                                                                                             | White          | 1.00                                                        |
|                                                                                                                          | Black          | <b>0.721 (0.544 - 0.954)</b>                                |
|                                                                                                                          | Hispanic       | 0.841 (0.682 - 1.036)                                       |
|                                                                                                                          | Other          | <b>0.587 (0.447 - 0.771)</b>                                |
| Heard of HPV vaccine                                                                                                     | White          | 1.00                                                        |
|                                                                                                                          | Black          | <b>0.547 (0.422 - 0.708)</b>                                |
|                                                                                                                          | Hispanic       | <b>0.582 (0.458 - 0.741)</b>                                |
|                                                                                                                          | Other          | <b>0.548 (0.400 - 0.750)</b>                                |
| HPV can cause cervical cancer                                                                                            | White          | 1.00                                                        |
|                                                                                                                          | Black          | <b>0.608 (0.428 - 0.863)</b>                                |
|                                                                                                                          | Hispanic       | 0.745 (0.513 - 1.082)                                       |
|                                                                                                                          | Other          | <b>0.573 (0.356 - 0.923)</b>                                |
| HPV can cause oral cancer                                                                                                | White          | 1.00                                                        |
|                                                                                                                          | Black          | <b>0.674 (0.483 - 0.941)</b>                                |
|                                                                                                                          | Hispanic       | 0.926 (0.620 - 1.382)                                       |
|                                                                                                                          | Other          | 0.924 (0.589 - 1.450)                                       |
| HPV can cause anal cancer                                                                                                | White          | 1.00                                                        |
|                                                                                                                          | Black          | 0.763 (0.526 - 1.106)                                       |
|                                                                                                                          | Hispanic       | 0.898 (0.599 - 1.345)                                       |
|                                                                                                                          | Other          | 0.907 (0.590 - 1.395)                                       |
| HPV can cause penile cancer                                                                                              | White          | 1.00                                                        |
|                                                                                                                          | Black          | 1.191 (0.861 - 1.648)                                       |
|                                                                                                                          | Hispanic       | 1.037 (0.732 - 1.468)                                       |
|                                                                                                                          | Other          | 0.851 (0.592 - 1.222)                                       |
| a. OR = odds ratio                                                                                                       |                |                                                             |
| b. CI = confidence interval                                                                                              |                |                                                             |
| Boldface indicates statistical significance (p<0.05)                                                                     |                |                                                             |

| Table S2. Ad-Hoc Analysis: Discussion of HPV Vaccination with<br>Healthcare Provider in Those Who Had A Regular Healthcare<br>Provider by Race/Ethnicity <sup>a</sup>                   |      |                             |
|-----------------------------------------------------------------------------------------------------------------------------------------------------------------------------------------|------|-----------------------------|
|                                                                                                                                                                                         | %    | Age-Adjusted OR (95%<br>CI) |
| White, N=357                                                                                                                                                                            | 38.0 | 1.00                        |
| Black, N=117                                                                                                                                                                            | 38.5 | 0.98 (0.53 - 1.83)          |
| Hispanic, N=82                                                                                                                                                                          | 38.6 | 0.98 (0.42 - 2.25)          |
| Other, N=66                                                                                                                                                                             | 21.8 | <b>0.44 (0.20 - 0.95)</b>   |
| a. Participants only answered this question is they reported having<br>family member in their household between ages 9-27 years<br>Boldface indicates statistical significance (p<0.05) |      |                             |
